# Supplementary material
Source: PubMed Central journal article supplement (PMC4824182)
Supplement: NIHMS772160-supplement-supplement_1.pdf [file NIHMS772160-supplement-supplement_1.pdf]

**Supplementary Table 1. Cohort creation**

| <b>Selection Criteria</b>                                                                                                                                                                                          | <b>N</b> | <b>Number excluded</b> |
|--------------------------------------------------------------------------------------------------------------------------------------------------------------------------------------------------------------------|----------|------------------------|
| Female breast cancer treated with mastectomy between 1998 and 2007                                                                                                                                                 | 44735    |                        |
| Continuous coverage from 3 months prior through 23 months after mastectomy                                                                                                                                         | 24141    | 20594                  |
| No diagnosis codes for distant metastasis                                                                                                                                                                          | 21546    | 2595                   |
| No radiation administered within 3 months prior to mastectomy                                                                                                                                                      | 21101    | 445                    |
| Two or more diagnosis codes for breast cancer or ductal carcinoma in situ from 3 months prior through 12 months after mastectomy                                                                                   | 20560    | 541                    |
| Treated with either: (1) mastectomy with no reconstruction within 23 months of mastectomy, (2) mastectomy with immediate implant-based reconstruction, or (3) mastectomy with immediate autologous reconstruction. | 14894    | 5666                   |

**Supplementary Table 2. Diagnosis and procedure codes used to select cohort and define surgery, reconstruction, and covariates**

|                                  | <b>ICD-9 diagnosis codes</b>                              | <b>ICD-9 procedure codes</b>                                 | <b>CPT codes</b>                                                                                  | <b>Time interval relative to date of mastectomy</b> |
|----------------------------------|-----------------------------------------------------------|--------------------------------------------------------------|---------------------------------------------------------------------------------------------------|-----------------------------------------------------|
| Invasive breast cancer           | 174.X                                                     |                                                              |                                                                                                   | -3 through +11 months                               |
| Ductal carcinoma in situ         | 233.0                                                     |                                                              |                                                                                                   | -3 through +11 months                               |
| Distant Metastasis               | 196.XX- 199.XX<br>(excluding 196.0, 196.3, 198.2, 198.81) |                                                              |                                                                                                   | -3 through +11 months                               |
| Mastectomy                       |                                                           | 85.4, 85.41-85.48, 85.33, 85.34, 85.35, 85.36                | 19180,19182,19200,19220,19240,19303,19304, 19305,19306, 19307                                     | date of mastectomy                                  |
| Bilateral mastectomy             |                                                           | 85.35, 85.36, 85.42, 85.44, 85.46, 85.48                     |                                                                                                   | date of mastectomy                                  |
| Breast cancer lymph node surgery |                                                           | 40.3, 40.23, 40.51, 85.43, 85.45, 85.47                      | 38740, 38745, 38525, 19162, 19200, 19220, 19240, 19302, 19307                                     | -3 through +11 months                               |
| Radiation therapy                | V58.0, V66.1, V67.1                                       | 92.2, 92.20 – 92.27, 92.29, 92.3, 92.30 - 92.39, 92.4, 92.41 | 77371-77373, 77401 – 77525, 77761 – 77799, G0174, G0251, G0339, G0340, G0173, 0082T, 61793, 0182T | -3 through +11 months                               |

|                           |                     |                                                                                                                                                                |                                                                                                                                                                                                      |                       |
|---------------------------|---------------------|----------------------------------------------------------------------------------------------------------------------------------------------------------------|------------------------------------------------------------------------------------------------------------------------------------------------------------------------------------------------------|-----------------------|
| Chemotherapy              | V58.1, V66.2, V67.2 | 99.25                                                                                                                                                          | 96400 – 96549, J9000 – J9999, Q0083 – Q0085, J8520, J8521, J8530, J8540, J8560, J8597, J8610, J8999; The following codes were excluded: J9003, J9165, J9175, J9202, J9209, J9212-J9226, J9240, J9395 | -3 through +11 months |
| Any reconstruction        |                     | 85.53, 85.54, 85.33, 85.35, 85.95, 85.70, 85.71, 85.72, 85.73, 85.74, 85.75, 85.76, 85.7, 85.79, 85.86, 85.82, 85.83, 85.84, 85.85, 85.89, 85.86, 85.93, 85.96 | 19361, 19364, 19366, 19367, 19368, 19369, 19340, 19342, 19357, 19350,                                                                                                                                | -0 to +24 months      |
| Autologous reconstruction |                     | 85.70, 85.71, 85.72, 85.73, 85.74, 85.75, 85.76, 85.7, 85.79, 85.84, 85.85                                                                                     | 19361, 19364, 19367, 19368, 19369                                                                                                                                                                    | -0 to +24 months      |
| Implant Reconstruction    |                     | 85.53, 85.54, 85.33, 85.35                                                                                                                                     | 19340, 19342                                                                                                                                                                                         | -0 to +24 months      |
| Tissue expander           |                     | 85.95                                                                                                                                                          | 19357                                                                                                                                                                                                | -0 to +24 months      |

Abbreviations: CPT (current procedural terminology), ICD (International Classification of Diseases)

**Supplementary Table 3. Definition of outcomes derived from claims**

| <b>Outcome</b>     | <b>Description</b>                                                                                                | <b>ICD-9 diagnosis codes</b> | <b>ICD-9 procedure codes</b> | <b>CPT codes</b> |
|--------------------|-------------------------------------------------------------------------------------------------------------------|------------------------------|------------------------------|------------------|
| Wound complication | Disruption of operation wound                                                                                     | 998.3                        |                              |                  |
|                    | Disruption of external operation wound                                                                            | 998.32                       |                              |                  |
|                    | Nonhealing surgical wound                                                                                         | 998.83                       |                              |                  |
| Infection          | Persistent postoperative fistula                                                                                  | 998.6                        |                              |                  |
|                    | Inflammatory disease of breast                                                                                    | 611.0                        |                              |                  |
|                    | Carbuncle/furuncle of trunk including breast                                                                      | 680.2                        |                              |                  |
|                    | Cellulitis/abscess of trunk including pectoral region, chest wall                                                 | 682.2                        |                              |                  |
|                    | Cellulitis/abscess of upper arm and forearm including axilla/shoulder                                             | 682.3                        |                              |                  |
|                    | Cellulitis/abscess of unspecified site                                                                            | 682.9                        |                              |                  |
|                    | Other local infections of skin and subcutaneous tissue including pyoderma, pyogenic granuloma, other, unspecified | 686.X                        |                              |                  |
|                    | Infected postoperative seroma                                                                                     | 998.51                       |                              |                  |
|                    | Other postoperative infection                                                                                     | 998.59                       |                              |                  |
|                    | Erysipelas                                                                                                        | 035.X                        |                              |                  |
|                    | Infection and inflammatory reaction caused by other internal prosthetic device, implant, and graft                | 996.69                       |                              |                  |

|                 |                                                   |        |       |       |
|-----------------|---------------------------------------------------|--------|-------|-------|
|                 | Postoperative infection, not elsewhere classified | 998.50 |       |       |
|                 | Infected postoperative seroma                     | 998.51 |       |       |
|                 | Other postoperative infection                     | 998.59 |       |       |
| Implant removal | Removal of implant of breast                      |        | 85.94 |       |
|                 | Removal of intact mammary implant                 |        |       | 19328 |
|                 | Removal of mammary implant material               |        |       | 19330 |
| Fat necrosis    | Fat necrosis                                      | 611.3  |       |       |

---

Abbreviations: CPT (current procedural terminology), ICD (International Classification of Diseases)
